# Supplementary material for: Cost-Effectiveness of Extending the National Influenza Vaccination Program in South Korea: Does Vaccination of Older Adults Provide Health Benefits to the Entire Population?
Source: MDPI journal article supplement (doi:10.3390/vaccines10060932), 2022-06-10
Supplement: s1 [file s1]

**Supplementary Table S1.** List of ICD-10 codes used in the definition.

| Definition                                 |                                   | ICD-10 codes                                                                             | Source |
|--------------------------------------------|-----------------------------------|------------------------------------------------------------------------------------------|--------|
| Influenza and influenza-like illness (ILI) | Influenza                         | J09, J10, J11                                                                            | [1]    |
|                                            | Acute upper respiratory infection | J06                                                                                      |        |
|                                            | Acute lower respiratory infection | J22                                                                                      |        |
|                                            | Pneumonia, organism unspecified   | J18                                                                                      | [2]    |
|                                            | Viral infection, unspecified site | B34                                                                                      |        |
|                                            | Pneumonia                         | J12, J13, J14, J15, J16, J17, J18                                                        |        |
|                                            | Encephalitis                      | A85.8, A86, A87.8, A87.9, A89, B94.1, G038, G039, G04.0, G04.8, G04.9, G05.1, G05.8, G36 |        |
|                                            | Myositis                          | M60.0, M60.1, M60.8, M60.9                                                               | [1]    |
|                                            | Myocarditis, pericarditis         | I41.1, I51.4, I30, I31.9, I40, I51.8, B33.2                                              |        |
|                                            | Acute myocardial infarction       | I21, I23, I24                                                                            |        |
| Acute complications related to influenza   | Stroke                            | I63                                                                                      |        |
|                                            | Rhabdomyolysis                    | M62.8                                                                                    |        |
|                                            | Transverse myelitis               | G37.3, G37.8, G37.9                                                                      |        |

1. Choi, M.J.; Shin, G.; Kang, D.; Lim, J.-O.; Kim, Y.-K.; Choi, W.S.; Yun, J.-W.; Noh, J.Y.; Song, J.Y.; Kim, W.J. Cost-Effectiveness of Influenza Vaccination Strategies in Adults: Older Adults Aged  $\geq 65$  Years, Adults Aged 50–64 Years, and At-Risk Adults Aged 19–64 Years. *Vaccines* **2022**, *10*, 445.
2. Moore, K.; Black, J.; Rowe, S.; Franklin, L. Syndromic surveillance for influenza in two hospital emergency departments. Relationships between ICD-10 codes and notified cases, before and during a pandemic. *BMC Public Health* **2011**, *11*, 1-7.

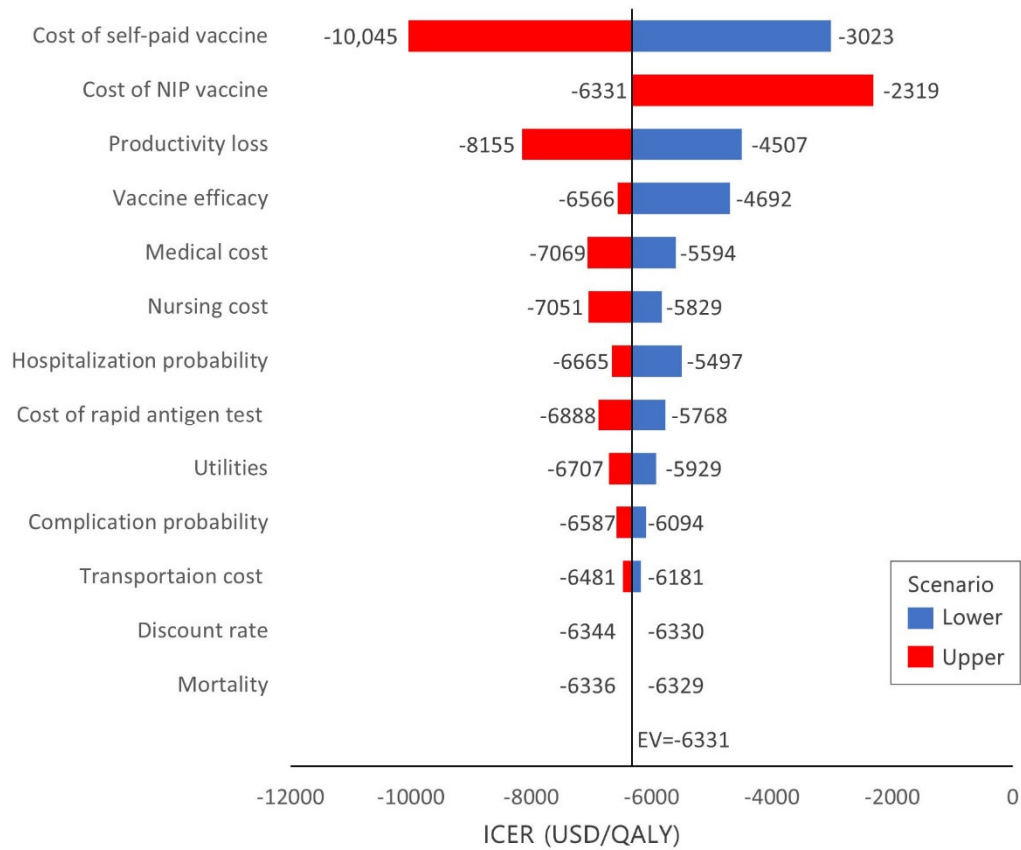

**Supplementary Figure S1.** Tornado diagram of deterministic sensitivity analysis (societal perspective): 50 to 64 years old with vaccine coverage 80%, including indirect effects.

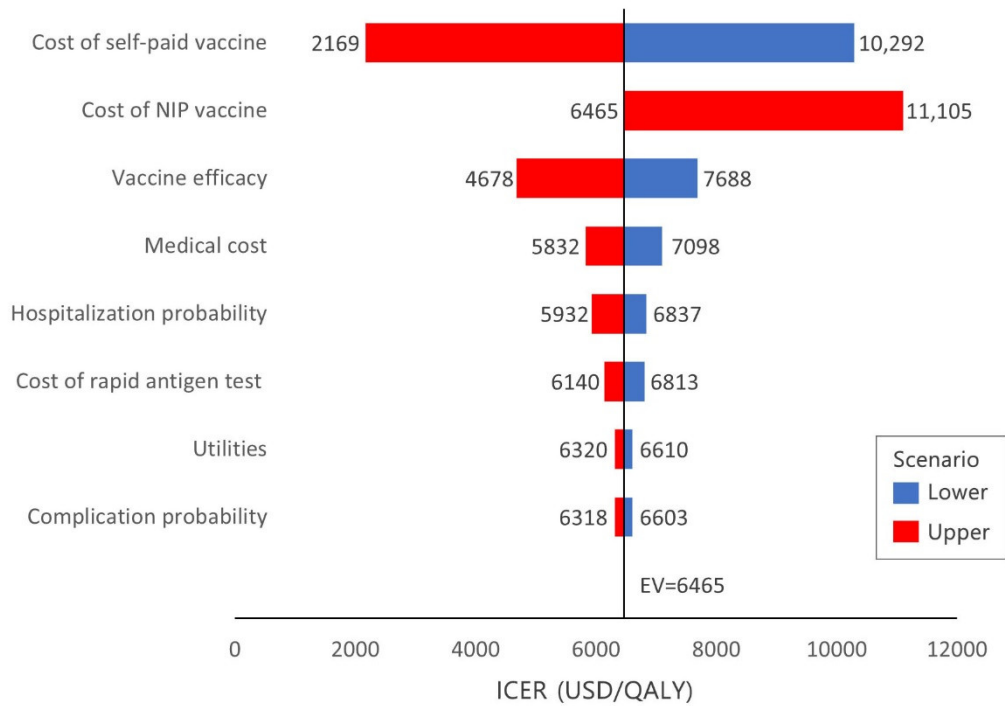

**Supplementary Figure S2.** Tornado diagram of deterministic sensitivity analysis (without indirect effects): healthcare sector perspective, 50 to 64 years old with vaccine coverage 80%, not including

indirect effects.

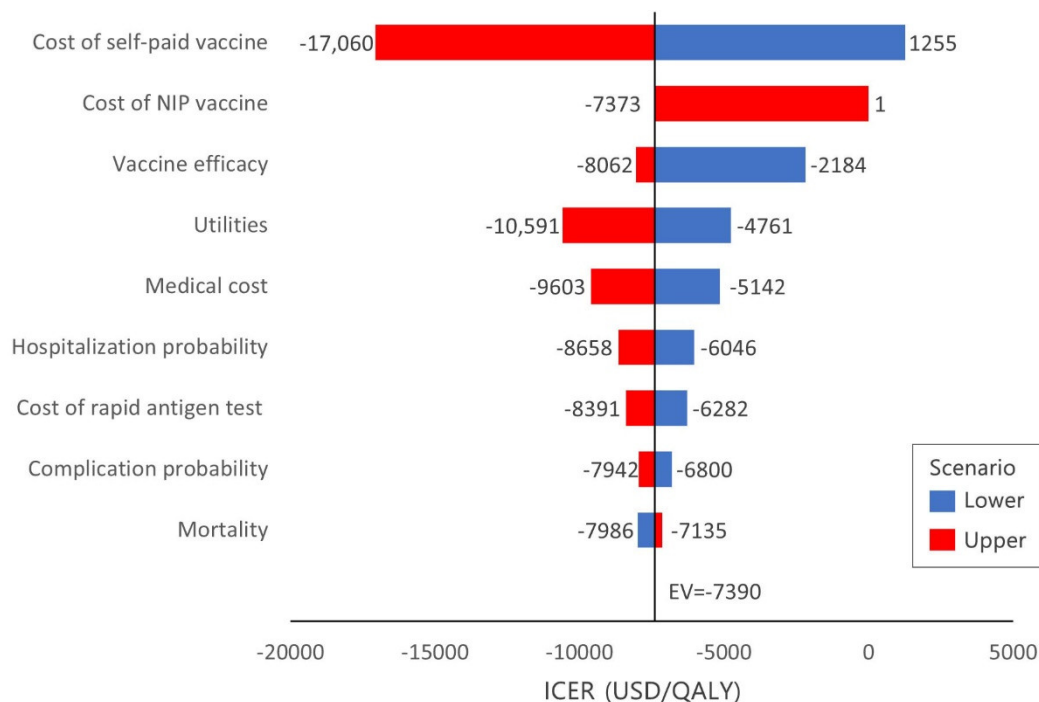

**Supplementary Figure S3.** Tornado diagram of deterministic sensitivity analysis (60 to 64 years old): healthcare sector perspective, 60 to 64 years old with vaccine coverage 80%, including indirect effects.

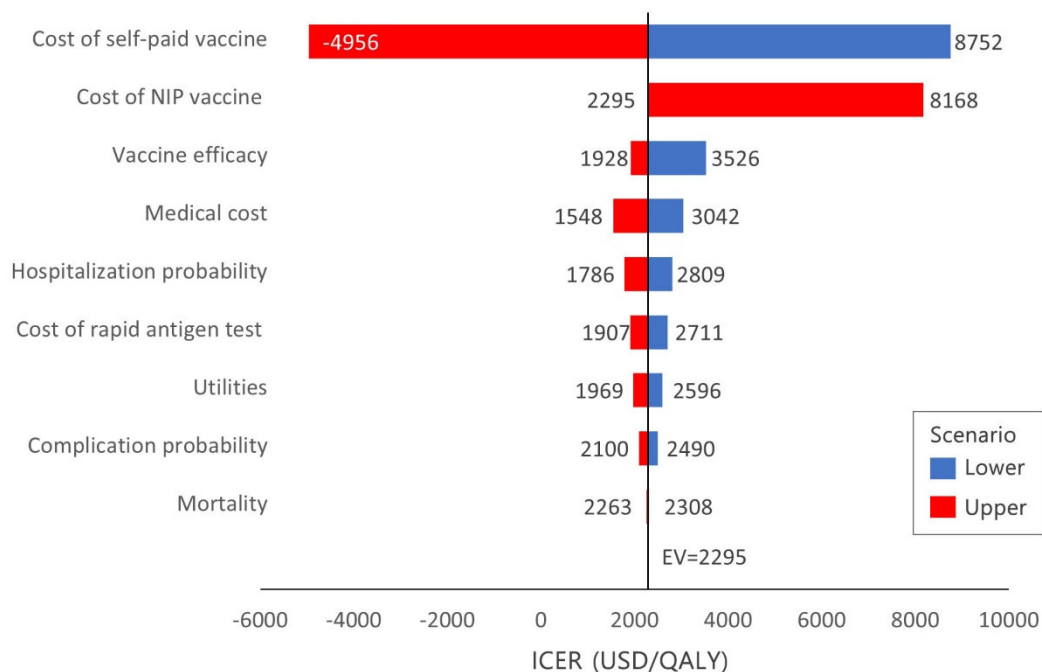

**Supplementary Figure S4.** Tornado diagram of deterministic sensitivity analysis (vaccine coverage 60%): healthcare sector perspective, 50 to 64 years old with vaccine coverage 60%, including indirect effects.
